# Supplementary material for: Molecular Profiling of Druggable Targets in Clear Cell Renal Cell Carcinoma Through Targeted RNA Sequencing
Source: PubMed Central journal article supplement (PMC6407434; doi:10.3389/fonc.2019.00117), 2019-03-01
Supplement: Table_1.pdf [file Table_1.pdf]

**Supplementary Table SI. Transcripts for smMIP design.** SmMIPs were designed against the antisense strand of predicted transcripts (UCSC human genome assembly hg19 and splice variant specific FASTA sequences). The genes listed are newly added to the panel published in (de Bitter et al., 2017).

| <b>Gene symbol</b>  | <b>Gene name</b>                                                            | <b>RefSeq mRNA ID (hg19)</b> |
|---------------------|-----------------------------------------------------------------------------|------------------------------|
| <b>ADPGK</b>        | ADP-dependent glucokinase                                                   | NM_031284                    |
| <b>ALK</b>          | ALK receptor tyrosine kinase                                                | NM_004304                    |
| <b>AR</b>           | Androgen receptor, full length                                              | NM_000044                    |
| <b>AXL</b>          | AXL receptor tyrosine kinase                                                | NM_021913                    |
| <b>BRAF</b>         | B-Raf proto-oncogene, serine/threonine kinase                               | NM_004333                    |
| <b>CAT</b>          | Catalase                                                                    | NM_001752                    |
| <b>CD274</b>        | Programmed Cell Death 1 Ligand 1                                            | NM_014143                    |
| <b>CTLA4</b>        | Cytotoxic T-Lymphocyte Associated Protein 4                                 | NM_005214                    |
| <b>EGFR</b>         | Epidermal growth factor receptor                                            | NM_005228                    |
| <b>EGFRvIII</b>     | Epidermal growth factor receptor variant III                                | FASTA                        |
| <b>ERBB2</b>        | Human epidermal growth factor receptor 2 (HER2)                             | NM_004448                    |
| <b>ERBB3</b>        | Human epidermal growth factor receptor 3 (HER3)                             | NM_001982                    |
| <b>ERBB4</b>        | Human epidermal growth factor receptor 4 (HER4)                             | NM_005235                    |
| <b>FBP1</b>         | Fructose-1,6-biphosphatase 1                                                | NM_000507                    |
| <b>FGFR1</b>        | Fibroblast growth factor receptor 1                                         | NM_023110                    |
| <b>FGFR2</b>        | Fibroblast growth factor receptor 2                                         | NM_000141                    |
| <b>FOLH1</b>        | Folate Hydrolase (Prostate-Specific Membrane Antigen, PSMA)                 | NM_004476                    |
| <b>IGF1R</b>        | Insulin like growth factor 1 receptor                                       | NM_000875                    |
| <b>VEGFR2 (KDR)</b> | Vascular endothelial growth factor receptor 2/Kinase insert domain receptor | NM_002253                    |
| <b>KIT</b>          | KIT proto-oncogene receptor tyrosine kinase                                 | NM_000222                    |
| <b>KLK3</b>         | Kallikrein Related Peptidase 3 (Prostate-Specific Antigen, PSA)             | NM_001648                    |
| <b>KRAS</b>         | KRAS proto-oncogene, GTPase                                                 | NM_033360                    |
| <b>MERTK</b>        | MER proto-oncogene, tyrosine kinase                                         | NM_006343                    |
| <b>MET</b>          | MET proto-oncogene, tyrosine kinase (variant 2)                             | FASTA                        |
| <b>METvar2d10</b>   | MET variant 2, delta 10                                                     | FASTA                        |
| <b>METd4-5</b>      | MET delta 4-5                                                               | FASTA                        |
| <b>METd7-8</b>      | MET delta 7-8                                                               | FASTA                        |
| <b>METd14</b>       | MET delta 14                                                                | FASTA                        |
| <b>MST1R</b>        | Macrophage stimulating 1 receptor                                           | NM_002447                    |
| <b>NTRK1</b>        | Neurotrophic Receptor Tyrosine Kinase 1                                     | NM_002529                    |
| <b>NTRK2</b>        | Neurotrophic Receptor Tyrosine Kinase 2                                     | NM_006180                    |
| <b>PDCD1</b>        | Programmed cell death 1                                                     | NM_005018                    |
| <b>PDGFRA</b>       | Platelet-derived growth factor receptor, alpha polypeptide                  | NM_006206                    |
| <b>PDGFRB</b>       | Platelet-derived growth factor receptor, beta polypeptide                   | NM_002609                    |
| <b>PLXND1</b>       | Plexin D1                                                                   | NM_015103                    |
| <b>PTEN</b>         | Phosphatase and tensin homolog                                              | NM_000314                    |
| <b>RET</b>          | RET proto-oncogene                                                          | NM_020975                    |
| <b>TP53</b>         | Tumor protein p53                                                           | NM_000546                    |

|                 |                                    |       |
|-----------------|------------------------------------|-------|
| <b>VEGF (A)</b> | Vascular endothelial growth factor | FASTA |
| <b>VEGF121</b>  | VEGF isoform 121                   | FASTA |
| <b>VEGF121b</b> | VEGF isoform 121b                  | FASTA |
| <b>VEGF165</b>  | VEGF isoform 165                   | FASTA |
| <b>VEGF165b</b> | VEGF isoform 165b                  | FASTA |
| <b>VEGF189</b>  | VEGF isoform 189                   | FASTA |
| <b>VEGF189b</b> | VEGF isoform 189b                  | FASTA |

---
