# Supplementary material for: Molecular Profiling of Druggable Targets in Clear Cell Renal Cell Carcinoma Through Targeted RNA Sequencing
Source: PubMed Central journal article supplement (PMC6407434; doi:10.3389/fonc.2019.00117), 2019-03-01
Supplement: Table_2.pdf [file Table_2.pdf]

**Supplementary Table SII. Gene expression in cluster a vs. cluster b (non-significant).** Fold changes of cluster b/cluster a are indicated. Significance was determined using a Wilcoxon Mann-Whitney U test with Benjamini Hochberg correction for multiple testing ( $p < 0.05$ ,  $FDR < 0.01$ ). Note that for significance, the p-value must not exceed the FDR. Significant differential gene expression in cluster a vs. cluster b is shown in Table 1. Fold changes are calculated as (cluster b/a), or  $-1/(cluster\ b/a)$  to prevent fold changes  $> 0$  and  $< 1$ . FC, fold change.

For gene expression levels in individual samples, see supplementary excel files.

| Gene    | Mean FPM<br>Cluster a | Mean FPM<br>Cluster b | P-value | FDR   | FC<br>Cluster b/a | Significant? |
|---------|-----------------------|-----------------------|---------|-------|-------------------|--------------|
| FH      | 433.10                | 182.34                | 0.004   | 0.003 | -2.38             | N            |
| IDH2    | 1337.13               | 655.22                | 0.004   | 0.003 | -2.04             | N            |
| PGAM1   | 482.42                | 810.02                | 0.004   | 0.003 | 1.68              | N            |
| SDHC    | 2775.33               | 1572.76               | 0.004   | 0.003 | -1.76             | N            |
| SLC16A7 | 269.57                | 127.95                | 0.004   | 0.003 | -2.11             | N            |
| ACO2    | 822.50                | 281.67                | 0.005   | 0.003 | -2.92             | N            |
| ATG4A   | 153.21                | 93.77                 | 0.005   | 0.003 | -1.63             | N            |
| CPT1A   | 906.39                | 508.98                | 0.005   | 0.003 | -1.78             | N            |
| ENO1    | 8921.33               | 17504.47              | 0.005   | 0.004 | 1.96              | N            |
| GLUD1   | 2424.01               | 1231.93               | 0.005   | 0.004 | -1.97             | N            |
| MDH1    | 1035.21               | 476.61                | 0.005   | 0.004 | -2.17             | N            |
| VEGF    | 130.47                | 649.38                | 0.005   | 0.004 | 4.98              | N            |
| VEGF121 | 253.32                | 1094.29               | 0.005   | 0.004 | 4.32              | N            |
| CYCS    | 799.54                | 413.20                | 0.008   | 0.004 | -1.94             | N            |
| IGF1R   | 670.63                | 355.06                | 0.008   | 0.004 | -1.89             | N            |
| SDHB    | 674.50                | 289.54                | 0.008   | 0.004 | -2.33             | N            |
| SDHD    | 2089.99               | 912.76                | 0.008   | 0.004 | -2.29             | N            |
| SOD1    | 1072.39               | 552.64                | 0.008   | 0.004 | -1.94             | N            |
| HK2     | 13.79                 | 105.38                | 0.011   | 0.004 | 7.64              | N            |
| IDH1    | 1478.08               | 616.60                | 0.011   | 0.004 | -2.40             | N            |
| IDH3B   | 729.51                | 451.73                | 0.011   | 0.004 | -1.61             | N            |
| TP53I3  | 255.24                | 139.34                | 0.011   | 0.004 | -1.83             | N            |
| TUBB    | 1872.45               | 3205.56               | 0.011   | 0.004 | 1.71              | N            |
| VEGF189 | 538.16                | 2034.06               | 0.011   | 0.005 | 3.78              | N            |
| VHLvar1 | 204.43                | 113.02                | 0.011   | 0.005 | -1.81             | N            |
| ACLY    | 1238.17               | 2239.27               | 0.015   | 0.005 | 1.81              | N            |
| PGD     | 632.18                | 385.22                | 0.015   | 0.005 | -1.64             | N            |
| PKM     | 2049.59               | 5550.71               | 0.015   | 0.005 | 2.71              | N            |
| PRKAA2  | 221.09                | 150.08                | 0.015   | 0.005 | -1.47             | N            |

|                   |         |          |       |       |        |   |
|-------------------|---------|----------|-------|-------|--------|---|
| <b>KLK3</b>       | 4.56    | 0.83     | 0.017 | 0.005 | -5.51  | N |
| <b>FGFR2</b>      | 180.65  | 90.97    | 0.019 | 0.005 | -1.99  | N |
| <b>GLUL</b>       | 455.17  | 939.55   | 0.033 | 0.005 | 2.06   | N |
| <b>IDH3G</b>      | 505.66  | 346.38   | 0.033 | 0.005 | -1.46  | N |
| <b>PRDX1</b>      | 1230.29 | 852.48   | 0.033 | 0.005 | -1.44  | N |
| <b>SDHA</b>       | 1986.26 | 1377.95  | 0.033 | 0.005 | -1.44  | N |
| <b>SOD2</b>       | 9163.55 | 17941.38 | 0.033 | 0.005 | 1.96   | N |
| <b>PFKFB1</b>     | 8.07    | 0.78     | 0.035 | 0.005 | -10.38 | N |
| <b>AXL</b>        | 218.97  | 478.62   | 0.042 | 0.005 | 2.19   | N |
| <b>BCAT1</b>      | 120.66  | 313.59   | 0.042 | 0.005 | 2.60   | N |
| <b>PGK1</b>       | 2722.60 | 4627.50  | 0.042 | 0.006 | 1.70   | N |
| <b>ACACA</b>      | 123.02  | 83.43    | 0.053 | 0.006 | -1.47  | N |
| <b>D2HGDH</b>     | 388.76  | 146.49   | 0.053 | 0.006 | -2.65  | N |
| <b>GPT</b>        | 143.71  | 20.65    | 0.053 | 0.006 | -6.96  | N |
| <b>HK3</b>        | 3.31    | 10.86    | 0.053 | 0.006 | 3.28   | N |
| <b>NAPRT1</b>     | 71.62   | 20.78    | 0.053 | 0.006 | -3.45  | N |
| <b>VHLvar2</b>    | 141.77  | 70.81    | 0.053 | 0.006 | -2.00  | N |
| <b>CHKA</b>       | 99.87   | 62.60    | 0.066 | 0.006 | -1.60  | N |
| <b>PTEN</b>       | 1115.14 | 794.30   | 0.066 | 0.006 | -1.40  | N |
| <b>EGFR</b>       | 55.85   | 161.09   | 0.081 | 0.006 | 2.88   | N |
| <b>NQO1</b>       | 598.09  | 248.85   | 0.081 | 0.006 | -2.40  | N |
| <b>PLXND1</b>     | 204.74  | 394.56   | 0.081 | 0.006 | 1.93   | N |
| <b>FOLH1</b>      | 1241.49 | 747.21   | 0.119 | 0.006 | -1.66  | N |
| <b>METvar2d10</b> | 12.51   | 26.47    | 0.119 | 0.006 | 2.12   | N |
| <b>CBR1</b>       | 235.53  | 116.17   | 0.142 | 0.006 | -2.03  | N |
| <b>TXN</b>        | 5316.66 | 3578.78  | 0.142 | 0.007 | -1.49  | N |
| <b>AR</b>         | 155.75  | 81.78    | 0.168 | 0.007 | -1.90  | N |
| <b>PRKAA1</b>     | 364.52  | 297.91   | 0.168 | 0.007 | -1.22  | N |
| <b>SLC7A1</b>     | 189.12  | 272.49   | 0.168 | 0.007 | 1.44   | N |
| <b>PDCD1</b>      | 1.11    | 3.81     | 0.176 | 0.007 | 3.42   | N |
| <b>BRAF</b>       | 294.71  | 249.98   | 0.197 | 0.007 | -1.18  | N |
| <b>GCLC</b>       | 368.37  | 303.04   | 0.197 | 0.007 | -1.22  | N |
| <b>GCLM</b>       | 153.07  | 197.06   | 0.197 | 0.007 | 1.29   | N |
| <b>HIF1A</b>      | 1314.51 | 792.40   | 0.197 | 0.007 | -1.66  | N |
| <b>HK1</b>        | 758.76  | 1009.56  | 0.197 | 0.007 | 1.33   | N |
| <b>NAMPT</b>      | 505.30  | 838.70   | 0.197 | 0.007 | 1.66   | N |
| <b>SLC2A3</b>     | 1951.53 | 3590.18  | 0.197 | 0.007 | 1.84   | N |
| <b>SLC9A1</b>     | 426.40  | 253.99   | 0.197 | 0.007 | -1.68  | N |
| <b>CTLA4</b>      | 33.83   | 101.18   | 0.230 | 0.007 | 2.99   | N |
| <b>MYC</b>        | 1200.02 | 1014.68  | 0.230 | 0.007 | -1.18  | N |
| <b>TALDO1</b>     | 1564.43 | 1426.44  | 0.230 | 0.008 | -1.10  | N |

|                 |         |         |       |       |       |   |
|-----------------|---------|---------|-------|-------|-------|---|
| <b>CD274</b>    | 32.65   | 47.39   | 0.266 | 0.008 | 1.45  | N |
| <b>GAD1</b>     | 50.13   | 32.98   | 0.266 | 0.008 | -1.52 | N |
| <b>METd14</b>   | 0.13    | 0.60    | 0.278 | 0.008 | 4.64  | N |
| <b>FGFR1</b>    | 317.29  | 215.07  | 0.306 | 0.008 | -1.48 | N |
| <b>GPI</b>      | 1149.93 | 1375.49 | 0.306 | 0.008 | 1.20  | N |
| <b>METd7-8</b>  | 0.29    | 0.93    | 0.327 | 0.008 | 3.25  | N |
| <b>CKB</b>      | 1222.20 | 528.16  | 0.349 | 0.008 | -2.31 | N |
| <b>FASN</b>     | 53.75   | 40.37   | 0.349 | 0.008 | -1.33 | N |
| <b>KRAS</b>     | 27.69   | 19.00   | 0.349 | 0.008 | -1.46 | N |
| <b>PDGFRB</b>   | 849.70  | 575.46  | 0.349 | 0.008 | -1.48 | N |
| <b>EGLN1</b>    | 262.23  | 298.60  | 0.395 | 0.008 | 1.14  | N |
| <b>ALK</b>      | 1.06    | 2.16    | 0.407 | 0.008 | 2.04  | N |
| <b>METd4-5</b>  | 0.00    | 0.27    | 0.451 | 0.008 | 1.00  | N |
| <b>ACTB</b>     | 6323.07 | 6890.94 | 0.497 | 0.008 | 1.09  | N |
| <b>ERBB3</b>    | 808.40  | 632.80  | 0.497 | 0.009 | -1.28 | N |
| <b>VEGFR2</b>   | 880.37  | 1439.45 | 0.497 | 0.009 | 1.64  | N |
| <b>ADPGK</b>    | 393.13  | 388.85  | 0.553 | 0.009 | -1.01 | N |
| <b>ARHGAP26</b> | 938.83  | 936.52  | 0.553 | 0.009 | -1.00 | N |
| <b>C12orf5</b>  | 58.20   | 71.97   | 0.553 | 0.009 | 1.24  | N |
| <b>TP53</b>     | 54.38   | 62.88   | 0.553 | 0.009 | 1.16  | N |
| <b>NOX1</b>     | 0.14    | 0.26    | 0.588 | 0.009 | 1.86  | N |
| <b>BCAT2</b>    | 146.69  | 142.04  | 0.612 | 0.009 | -1.03 | N |
| <b>VEGF121b</b> | 0.00    | 0.18    | 0.644 | 0.009 | 1.00  | N |
| <b>CBS</b>      | 20.40   | 17.86   | 0.672 | 0.009 | -1.14 | N |
| <b>EPAS1</b>    | 2169.06 | 2001.14 | 0.672 | 0.009 | -1.08 | N |
| <b>VEGF165b</b> | 1.12    | 15.11   | 0.718 | 0.009 | 13.49 | N |
| <b>MERTK</b>    | 475.81  | 554.85  | 0.735 | 0.009 | 1.17  | N |
| <b>RPIA</b>     | 155.72  | 105.84  | 0.735 | 0.009 | -1.47 | N |
| <b>NOX3</b>     | 0.14    | 0.15    | 0.747 | 0.009 | 1.03  | N |
| <b>GFPT1</b>    | 1070.69 | 1026.17 | 0.800 | 0.010 | -1.04 | N |
| <b>SLC1A2</b>   | 4.29    | 5.20    | 0.800 | 0.010 | 1.21  | N |
| <b>SLC5A1</b>   | 56.94   | 296.79  | 0.866 | 0.010 | 5.21  | N |
| <b>G6PD</b>     | 258.37  | 266.70  | 0.933 | 0.010 | 1.03  | N |
| <b>EGFRvIII</b> | 0.72    | 1.37    | 1.000 | 0.010 | 1.92  | N |
| <b>PARP1</b>    | 666.66  | 597.17  | 1.000 | 0.010 | -1.12 | N |
| <b>PGK2</b>     | 0.11    | 0.62    | 1.000 | 0.010 | 5.89  | N |

---
